# Supplementary material for: Hexosylceramides and Glycerophosphatidylcholine GPC(36:1) Increase in Multi-Organ Dysfunction Syndrome Patients with Pediatric Intensive Care Unit Admission over 8-Day Hospitalization
Source: MDPI journal article supplement (doi:10.3390/jpm11050339), 2021-04-24

**Supplementary Table S1.** Kendall Correlations between Lipid Value and Percent of Total Calories

| Group | Time  | Total dhSM | Total SM | Total Cer | Total 2-hydroxy Cer | Total Hex-Cer | Total Lac-Cer |
|-------|-------|------------|----------|-----------|---------------------|---------------|---------------|
| ECMO  | Day 1 | 0.499      | 0.262    | 0.577     | 0.000               | 0.157         | -0.052        |
| ECMO  | Day 3 | 0.158      | 0.293    | 0.000     | 0.586               | 0.293         | -0.350        |
| ECMO  | Day 8 | 0.200      | -0.200   | 0.467     | -0.333              | 0.067         | 0.067         |
| MODS  | Day 1 | N/A        | N/A      | N/A       | N/A                 | N/A           | N/A           |
| MODS  | Day 3 | N/A        | N/A      | N/A       | N/A                 | N/A           | N/A           |
| MODS  | Day 8 | N/A        | -0.429   | -0.214    | -0.182              | -0.214        | -0.071        |

Notes: 2-hydroxy Cer: 2-hydroxy ceramide; Cer: ceramide; dhSM: dihydrosphingomyelin; Hex-Cer: hexosylceramides; Lac-Cer: lactosylceramides; SM: Sphingomyelin.

**Supplementary Table S2:** Correlations between lipid values and viral infection (yes/no) in patients over time; not adjusted for age or sex

| Group | Time  | Infection | Total dhSM | Total SM | Total Cer | Total hydroxy-Cer | Total Lac-Cer |
|-------|-------|-----------|------------|----------|-----------|-------------------|---------------|
| MODS  | Day 1 | Bacterial | N/A        | 0.024    | 0.189     | N/A               | 0.450         |
| MODS  | Day 3 | Bacterial | N/A        | -0.159   | -0.106    | 0.447             | 0.080         |
| MODS  | Day 8 | Bacterial | N/A        | -0.436   | -0.109    | 0.111             | -0.109        |
| MODS  | Day 1 | Viral     | N/A        | -0.382   | -0.209    | N/A               | -0.247        |
| MODS  | Day 3 | Viral     | N/A        | 0.559    | 0.206     | -0.309            | 0.118         |
| MODS  | Day 8 | Viral     | N/A        | 0.000    | -0.109    | 0.056             | 0.000         |
| ECMO  | Day 1 | Viral     | 0.361      | 0.049    | -0.049    | -0.447            | -0.146        |
| ECMO  | Day 3 | Viral     | 0.136      | 0.252    | 0.504     | 0.378             | -0.065        |
| ECMO  | Day 8 | Viral     | -0.086     | -0.086   | -0.086    | 0.430             | 0.086         |

Notes: 2-hydroxy Cer: 2-hydroxy ceramide; Cer: ceramide; dhSM: dihydrosphingomyelin; Hex-Cer: hexosylceramides; Lac-Cer: lactosylceramides; SM: Sphingomyelin.

Supplementary Figure S1. Percent total cholesterol lipid species

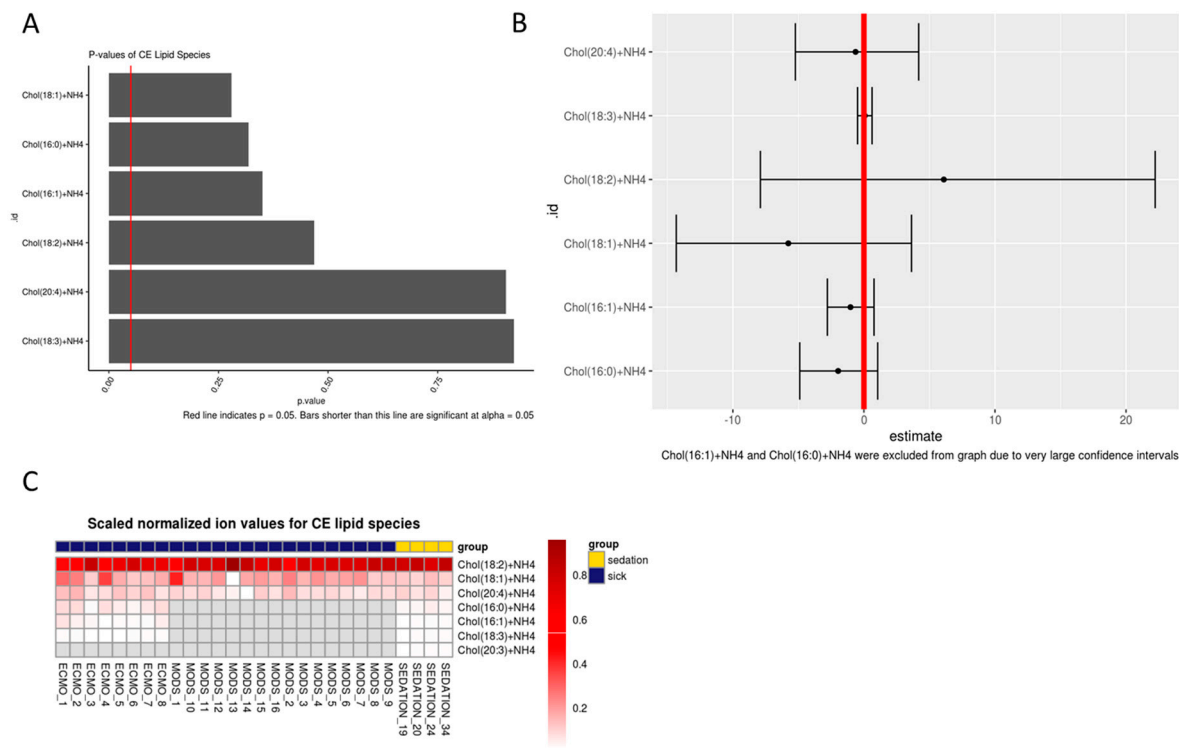

Supplementary Figure S2. Percent total triacylglycerol lipid species

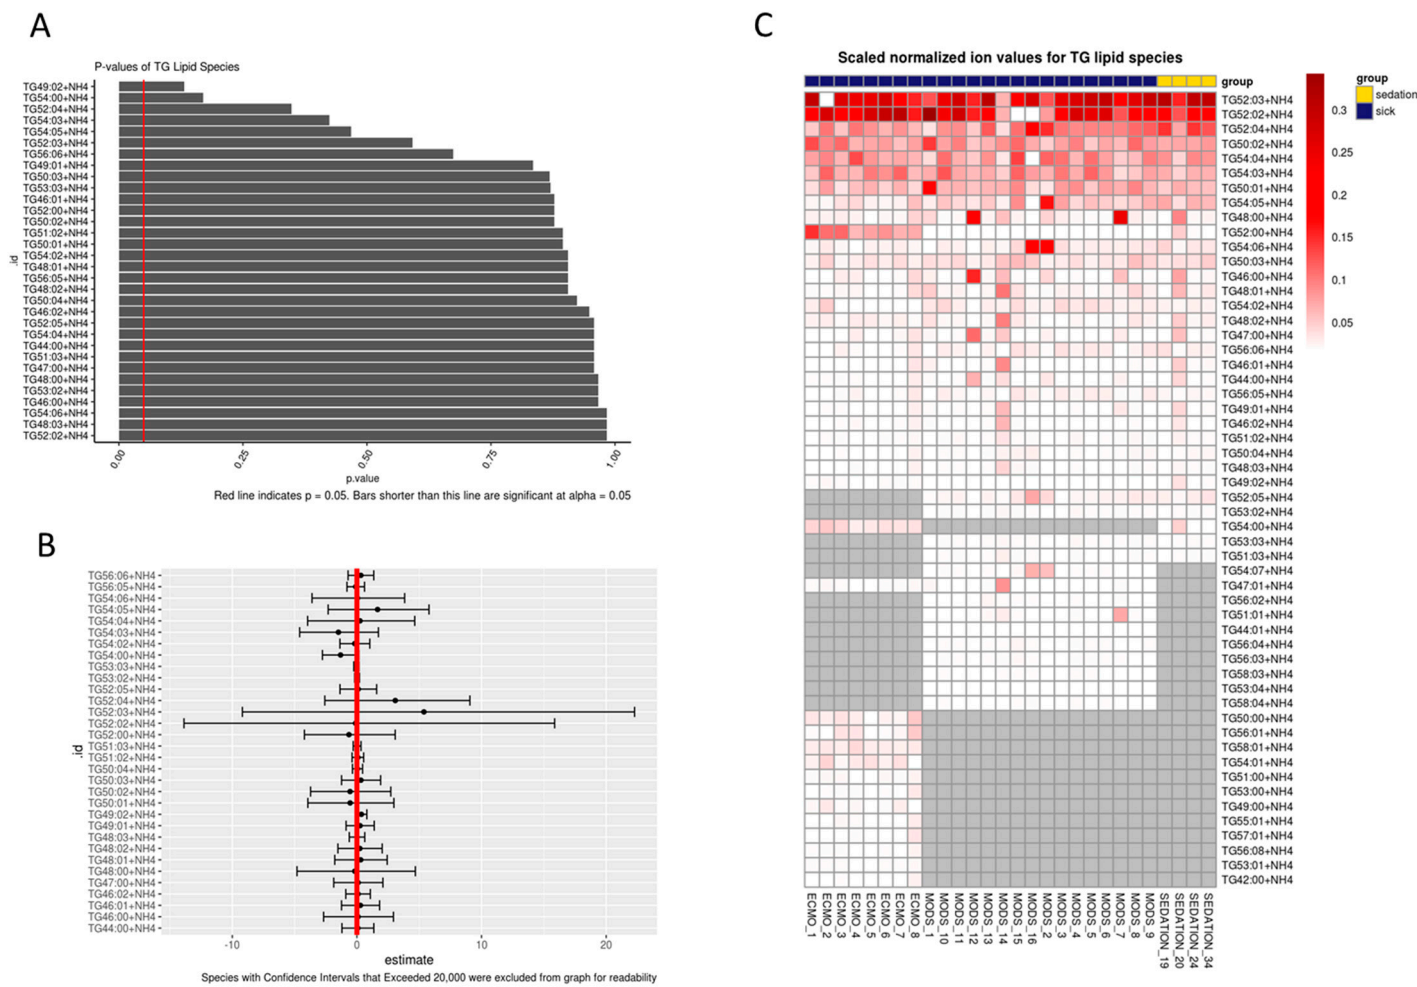

Supplementary Figure S3. Percent total diacylglycerol lipid species

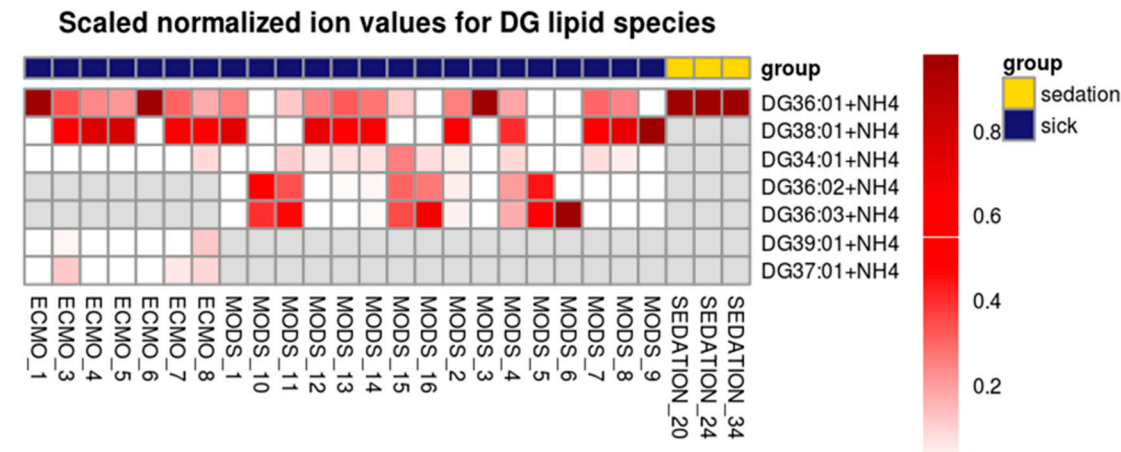

Supplement: s1 [file s1]
